# Supplementary material for: Eu doped Si-oxynitride fluorescent nanofibrous inorganic membranes with high flexibility
Source: Royal Society of Chemistry journal article supplement (doi:10.1039/c5ra18549a), 2015-01-01
Supplement: c5ra18549a1.pdf [file c5ra18549a1.pdf]

## Support information

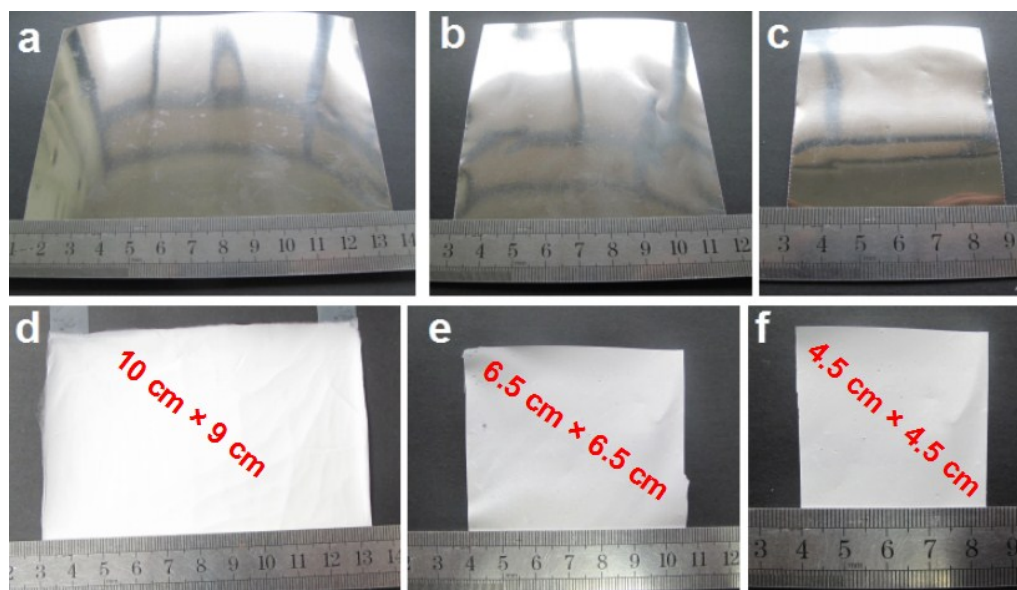

Fig. S1 (a, b, c) the different areas of collectors; (d, e, f) obtained the different areas of the precursor membranes.

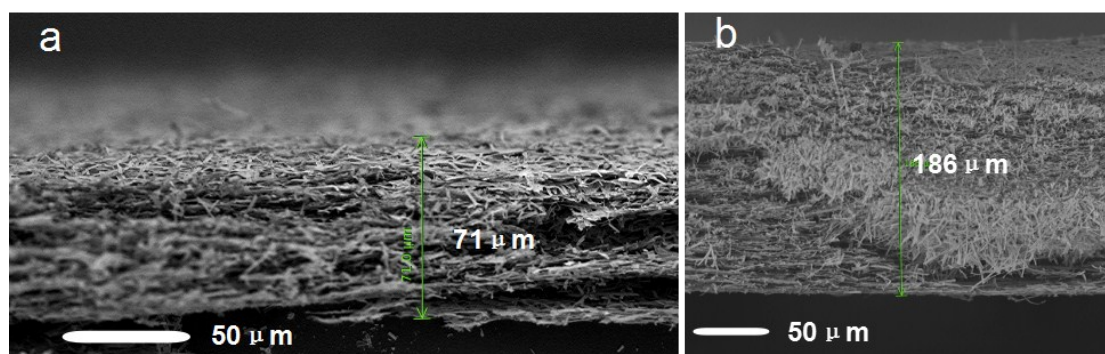

Fig. S2 With different electrospinning time, obtained the different thicknesses of the precursor membranes, (a) 4 h, (b) 10 h.

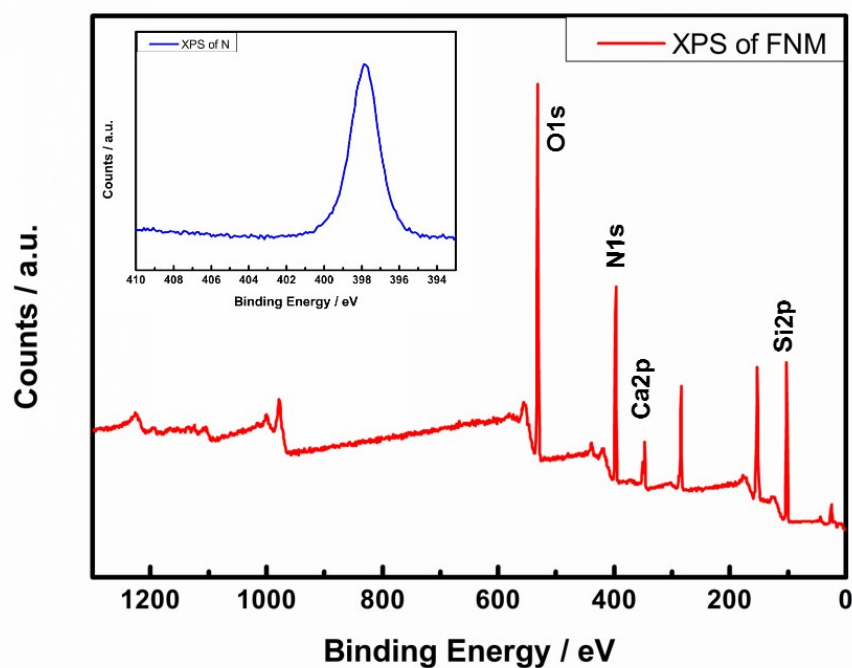

Fig. S3 XPS survey spectra of FNM, the inset shows the XPS of N1s

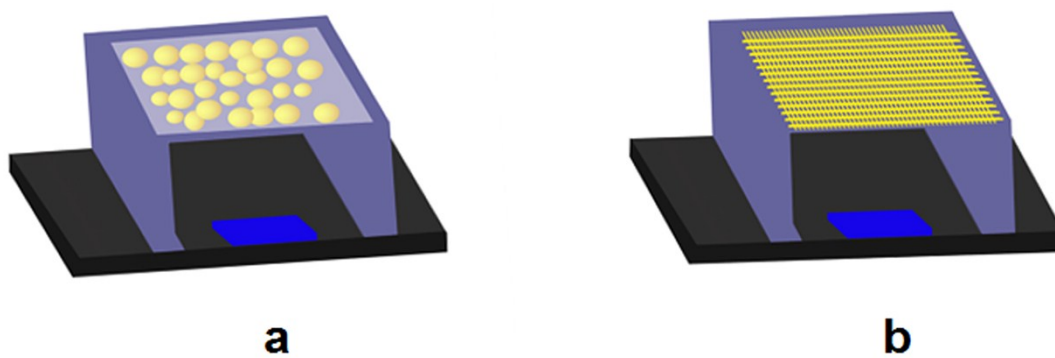

Fig. S4 The conventional florescence layer made up of phosphor and epoxy used in remote packaging WLEDs (a), free-standing inorganic fluorescence membrane used in remote packaging (b).
